# Supplementary material for: Estimation of Relative and Absolute Risks in a Competing-Risks Setting Using a Nested Case-Control Study Design: Example From the ProMort Study
Source: PubMed Central journal article supplement — Am J Epidemiol. 2019 Feb 14;188(6):1165–73. doi: 10.1093/aje/kwz026 (PMC8210820; doi:10.1093/aje/kwz026), 2019-02-14

## **Web Material**

### **Estimation of Relative and Absolute Risk in a Competing-Risk Setting Using a Nested Case-Control Study Design: Example from the ProMort Study**

Renata Zelic, Daniela Zugna, Matteo Bottai, Ove Andrén, Jonna Fridfeldt, Jessica Carlsson, Sabina Davidsson, Valentina Fiano, Michelangelo Fiorentino, Francesca Giunchi, Chiara Grasso, Luca Lianas, Cecilia Mascia, Luca Molinaro, Gianluigi Zanetti, Lorenzo Richiardi, Andreas Pettersson, and Olof Akre

## Table of contents:

|                                                                                                                                                                                                                                                                                                                              |    |
|------------------------------------------------------------------------------------------------------------------------------------------------------------------------------------------------------------------------------------------------------------------------------------------------------------------------------|----|
| <b>Web Appendix 1.</b> Analysis plan.....                                                                                                                                                                                                                                                                                    | 3  |
| Method 1 .....                                                                                                                                                                                                                                                                                                               | 3  |
| Method 2 .....                                                                                                                                                                                                                                                                                                               | 4  |
| <b>Web Appendix 2.</b> Stata codes.....                                                                                                                                                                                                                                                                                      | 6  |
| 1. Estimating selection probability for controls .....                                                                                                                                                                                                                                                                       | 6  |
| 2. Fitting a flexible parametric survival model .....                                                                                                                                                                                                                                                                        | 8  |
| 3. Estimating cumulative incidence function .....                                                                                                                                                                                                                                                                            | 9  |
| <b>Web Table 1.</b> The Absolute Bias in log(HR) Estimates for Death From Prostate Cancer Defined as the Difference in log(HRs) Estimated in 1,500 Nested Case-Control Studies Sampled with Replacement from NPCR and log(HRs) Estimated in NPCR, $\log(HR_{NCC})-\log(HR_{NPCR})$ .....                                     | 12 |
| <b>Web Table 2.</b> The Absolute Bias in log(HR) Estimates for Other Causes of Death Defined as the Difference in log(HRs) Estimated in 1,500 Nested Case-Control Studies Sampled with Replacement from NPCR and log(HRs) Estimated in NPCR, $\log(HR_{NCC})-\log(HR_{NPCR})$ .....                                          | 13 |
| <b>Web Table 3.</b> The Absolute Bias in CIF Estimates for Death from Prostate Cancer at 5, 10 and 15 years of follow-up. The Absolute Bias was Defined as the Difference in CIFs Estimated in 1,500 Nested Case-Control Studies Sampled with Replacement from NPCR and CIFs Estimated in NPCR, $CIF_{NCC}-CIF_{NPCR}$ ..... | 14 |
| <b>Web Figure 1.</b> Logarithm of the cause-specific hazard ratios and 95% confidence intervals of the risk of dying from prostate cancer and other causes estimated in NPCR, Sweden, 1998-2011, and using Method 1 and Method 2. ....                                                                                       | 19 |
| <b>Web Figure 2.</b> Cumulative incidence function and 95% confidence intervals of dying from prostate cancer for men with low- and intermediate-risk prostate cancer in NPCR and in ProMort, Sweden, 1998-2011. ....                                                                                                        | 20 |
| <b>Web Figure 3.</b> Cumulative incidence function and 95% confidence intervals of dying from prostate cancer for men with low- and intermediate-risk prostate cancer in NPCR, Sweden, 1998-2011, and using Method 1 and Method 2.....                                                                                       | 21 |

## Web Appendix 1. Analysis plan

In our example the event of interest is death from prostate cancer, while the competing event is death from other causes.

### Method 1

Sample two nested case-control studies, where:

1. Cases are all subjects who died from prostate cancer,  $K = 1$ , and incidence density sampling is used to select one control per case, matched on year and hospital of diagnosis (i.e. ProMort)
2. Cases are all subjects who died from other causes,  $K = 2$ , and incidence density sampling is used to select one control per case, matched on year and hospital of diagnosis.

Hence, there are two separate sets of controls for each endpoint.

Analysis steps:

1. Fit the flexible parametric proportional hazards model which is estimated on the log cumulative hazard scale where

$$\log[\Lambda_k(t|x_i, z_i)] = \log[\Lambda_{k,0}(t)] + \beta_k x_i + \gamma_k z_i$$

for each  $K$ , where  $x_i$  is a vector of covariates of interest and  $z_i$  is a vector of matching variables. The baseline log cumulative hazard function,  $\ln[\Lambda_{k,0}(t)]$ , is estimated using restricted cubic splines, so that

$$\log[\Lambda_k(t|x_i, z_i)] = s(\log(t)|\varepsilon_k, q_0) + \beta_k x_i + \gamma_k z_i$$

Where  $s(\log(t)|\varepsilon_k, q_0)$  is a restricted cubic spline function basis of  $\log(t)$  with a vector of knots  $q_0$  and associated parameters  $\varepsilon_k$ .

$$\lambda_k(t|x_i, z_i) = \frac{d \log[\Lambda_k(t|x_i, z_i)]}{dt} = \frac{ds(\log(t)|\varepsilon_k, q_0)}{dt} \exp(\log[\Lambda_k(t|x_i, z_i)])$$

The parameters  $\varepsilon_k$ ,  $\beta_k$  and  $\gamma_k$  can then be estimated by maximizing the weighted full likelihood:

$$\log[L(\varepsilon_k, \beta_k, \gamma_k)] = \sum_{i=1}^n (d_i \log[\lambda_k(t_i|x_i, z_i)] - \Lambda_k(t_i|x_i, z_i)) \omega_i$$

Where  $d_i$  is a binary event indicator,  $d = 1$  if  $t_i$  is an observed time of the event  $k$  and  $d = 0$  otherwise.

The weights are defined as

$$\omega_i = \frac{1}{p_i}$$

where  $p_i$  is a probability of being included in the nested case-control sample. For both the cases who died from prostate cancer and cases who died from other causes  $p_i = 1$ , while for controls we estimated  $p_i$  as

$$p_i = 1 - \prod_{T_i} \left(1 - \frac{m}{n_i - 1}\right)$$

$T_i$  is the set of event times for both endpoints  $K = 1, 2$  when subject  $i$  is a possible matched control and  $n_i$  is the risk set which satisfies the matching criteria at the time  $T_i$ .

2. Estimate the survival function:

$$S(t; x, z) = \prod_{t_j \leq t} [1 - (\lambda_1(\beta_1, \gamma_1) + \lambda_2(\beta_2, \gamma_2))]$$

3. Estimate the cumulative incidence function for endpoint of interest:

$$I_1(t; x, z) = \sum_{t_j \leq t} S(t_j; x, z) \lambda_1(\beta_1, \gamma_1)$$

## Method 2

1. Sample a nested case-control study for the event of interest where cases are all subjects who died from prostate cancer,  $K = 1$ , and incidence density sampling is used to select one control per case, matched on year and hospital of diagnosis (i.e. ProMort)
2. Select all subjects who died from other causes,  $K = 2$ , and use controls selected for the endpoint 1 as controls for these cases.

Follow the same analysis steps as in Method 1.

1. Fit the flexible parametric proportional hazards models described for Method 1

The parameters  $\varepsilon_k, \beta_k, \gamma_k$  can be estimated by maximizing the weighted full likelihood as in Method 1.

The weights  $\omega_i$  and a probability of being included in the nested case-control sample  $p_i$  are still defined as in Method 1. However,  $T_i$  is now the set of event times only for

$K = 1$  when subject  $i$  is a possible matched control and  $n_i$  is the risk set which satisfies the matching criteria at the time  $T_i$ .

4. Estimate the survival function and the cumulative incidence functions described for Method 1.

## Web Appendix 2. Stata codes

### 1. Estimating selection probability for controls

\* Declare data as survival data (the time-scale is defined as time since the date of diagnosis, but the code can be applied to different time-scales).

\* For ProMort and Method 2 failure event is death from prostate cancer, while for Method 2 failure event is death from prostate cancer and death from other causes

```
stset date_death, failure(status==1) origin(date_dg) exit(date_death) scale(365.25)
```

\* Define matching strata (matching variables are year and hospital of diagnosis)

```
egen strata=group(diagyear hospital)
```

\* Calculate the probability of being selected as a control within the matching stratum

```
gen p=.
```

```
sort strata _t
```

```
qui by strata: gen sum_status=sum(_d)
```

```
replace sum_status=. if _d!=1
```

```
gen num_control=1
```

\* max\_case – maximum number of cases in the matching stratum

```
foreach n of numlist 1/max_case {
```

```
    qui by strata: gen exit_t=_t if sum_status==`n'
```

```
    qui by strata: egen time=sum(exit_t)
```

```
    qui by strata: egen den=sum(float(_t)>=time & float(_t0)<=time)
```

```
    qui by strata: egen num=sum(float(_t)==exit_t & _d==1)
```

```
    replace p=1-min(1,num_control*num/(den-num)) if sum_status==`n'
```

```
    drop exit_t time den num
```

```
}
```

```
replace p=1 if p==.
```

```
gen k=1
```

\* max\_obs - maximum number of observations in the matching stratum with the largest sample size

```

foreach n of numlist 2/max_obs{
  foreach j of numlist 1(10)max_obs{
    qui by strata: replace k=k*p[_n-`j'] if _t0[_n]<=_t[_n-`j'] & _t[_n]>=_t[_n-`j'] & _n==`n' &
    _n>`j' & _d==0
    qui by strata: replace k=k*p[_n-(`j'+1)] if _t0[_n]<=_t[_n-(`j'+1)] & _t[_n]>=_t[_n-(`j'+1)]
    & _n==`n' & _n>(`j'+1) & _d==0
    qui by strata: replace k=k*p[_n-(`j'+2)] if _t0[_n]<=_t[_n-(`j'+2)] & _t[_n]>=_t[_n-(`j'+2)]
    & _n==`n' & _n>(`j'+2) & _d==0
    qui by strata: replace k=k*p[_n-(`j'+3)] if _t0[_n]<=_t[_n-(`j'+3)] & _t[_n]>=_t[_n-(`j'+3)]
    & _n==`n' & _n>(`j'+3) & _d==0
    qui by strata: replace k=k*p[_n-(`j'+4)] if _t0[_n]<=_t[_n-(`j'+4)] & _t[_n]>=_t[_n-(`j'+4)]
    & _n==`n' & _n>(`j'+4) & _d==0
    qui by strata: replace k=k*p[_n-(`j'+5)] if _t0[_n]<=_t[_n-(`j'+5)] & _t[_n]>=_t[_n-(`j'+5)]
    & _n==`n' & _n>(`j'+5) & _d==0
    qui by strata: replace k=k*p[_n-(`j'+6)] if _t0[_n]<=_t[_n-(`j'+6)] & _t[_n]>=_t[_n-(`j'+6)]
    & _n==`n' & _n>(`j'+6) & _d==0
    qui by strata: replace k=k*p[_n-(`j'+7)] if _t0[_n]<=_t[_n-(`j'+7)] & _t[_n]>=_t[_n-(`j'+7)]
    & _n==`n' & _n>(`j'+7) & _d==0
    qui by strata: replace k=k*p[_n-(`j'+8)] if _t0[_n]<=_t[_n-(`j'+8)] & _t[_n]>=_t[_n-(`j'+8)]
    & _n==`n' & _n>(`j'+8) & _d==0
    qui by strata: replace k=k*p[_n-(`j'+9)] if _t0[_n]<=_t[_n-(`j'+9)] & _t[_n]>=_t[_n-(`j'+9)]
    & _n==`n' & _n>(`j'+9) & _d==0
  }
}
gen p_final=1-k
replace p_final=1 if _d==1
gen ipw=1/p_final

```

## 2. Fitting a flexible parametric survival model

Variables included in the model:

1. Age at diagnosis ( $\leq 55$ ,  $>55-65$ ,  $>65-75$ ,  $>75$ ) - age (coded as: 0, 1, 2, 3)
2. PSA value at diagnosis ( $<4$ ,  $4-10$ ,  $\geq 10$ ) - psa (coded as: 0, 1, 2)
3. Gleason score ( $<7$ ,  $7$ ) - gleason (coded as: 0, 1)
4. Clinical tumor stage (T1a, T1b, T1c, T2) - tstage (coded as: 0, 1, 2, 3)
5. Year of diagnosis - diagyear (coded as: 1998-2011)
6. County of diagnosis - county (coded as: 1-22)

\* Declare data as survival data

### 1. NPCR

```
stset date_death, fail(status==1) origin(date_dg) exit(date_death) scale(365.25)
```

### 2. ProMort

\* casestr1 – variable denoting case/control status (1 - case, 0 – control)

```
stset date_death [pw=ipw], fail(casestr1==1) origin(date_dg) exit(date_death) scale(365.25)
```

\* Fit a flexible parametric proportional hazards model

```
stpm2 i.age i.psa gleason i.tstage i.diagyear i.county, scale(hazard) df(2) eform vce(robust)
```



### 3. Estimating cumulative incidence function

\* Expand the data, two rows of data per individual, one per each cause of death

```
expand 2
```

\* Generate an indicator variable for each cause of death and an overall indicator

```
bysort id_var: gen cause=_n
```

```
gen cancer=(cause==1)
```

```
gen other=(cause==2)
```

```
gen event=(cause==status)
```

\* Generate dummy variables for each category of factor variables included in the model

```
foreach var of varlist age psa gleason tstage diagyear county {
```

```
  levelsof `var', local(levels)
```

```
    foreach l of local levels {
```

```
      gen `var'`l'ca=`var'==`l' & cancer==1)
```

```
      gen `var'`l'oth=`var'==`l' & other==1)
```

```
    }
```

```
}
```

\* Baseline categories:

1. Age at diagnosis - 55.1-65 (age1ca/age1oth),
2. PSA value at diagnosis - <4 (psa0ca/psa0oth),
3. Gleason score - ≤6 (gleason0ca/gleason0oth),
4. Clinical tumor stage - T1c (tstage2ca/tstage2oth),
5. Year of diagnosis - 2004 (diagyear2004ca/diagyear2004oth)
6. County of diagnosis - Västra Götaland (12) (county12ca/county12oth)

```
qui ds age0ca-county22oth
```

```
local all_vars `r(varlist)'
```

```
local omit_vars age1ca age1oth psa0ca psa0oth gleason0ca gleason0oth tstage2ca tstage2oth
```

```
diagyear2004ca diagyear2004oth county12ca county12oth
```

local vars: list all\_vars-omit\_vars

\* Declare data as survival data

\* 1. NPCR

```
stset date_death, failure(event) origin(date_dg) exit(date_death) scale(365.25)
```

\* 2. ProMort, Method 1 and Method 2

```
stset date_death [pw=ipw], failure(event) origin(date_dg) exit(date_death) scale(365.25)
```

\* Simultaneously fit cause specific hazards model for death from prostate cancer and death from other causes  
stpm2 cancer other `vars', scale(hazard) dftvc(2) rcsbaseoff tvc(cancer other) nocons eform nolog vce(robust)

\* Predict cumulative incidence functions

```
foreach a in 0 1 2 3 {
```

```
  foreach p in 0 1 2 {
```

```
    if `a'==1 {
```

```
      if `p'==0 {
```

```
        stpm2cif cancer_`a'00`p' other_`a'00`p', cause1(cancer 1) cause2(other 1)
```

```
        stpm2cif cancer_`a'01`p' other_`a'01`p', cause1(cancer 1 gleason1ca 1) cause2(other 1 gleason1oth 1)
```

```
        stpm2cif cancer_`a'10`p' other_`a'10`p', cause1(cancer 1 tstage2ca 1) cause2(other 1 tstage2oth 1)
```

```
        stpm2cif cancer_`a'11`p' other_`a'11`p', cause1(cancer 1 gleason1ca 1 tstage2ca 1) cause2(other 1 gleason1oth 1 tstage2oth 1)
```

```
      }
```

```
      if `p'!=0 {
```

```
        stpm2cif cancer_`a'00`p' other_`a'00`p', cause1(cancer 1 psa`p'ca 1) cause2(other 1 psa`p'oth 1)
```

```
        stpm2cif cancer_`a'01`p' other_`a'01`p', cause1(cancer 1 psa`p'ca 1 g1ca 1) cause2(other 1 psa`p'oth 1 g1oth 1)
```

```
        stpm2cif cancer_`a'10`p' other_`a'10`p', cause1(cancer 1 psa`p'ca 1 tstage2ca 1) cause2(other 1 psa`p'oth 1 tstage2oth 1)
```

```

    stpm2cif cancer_`a'11`p' other_`a'11`p', cause1(cancer 1 psa`p'ca 1 gleason1ca 1
    tstage2ca 1) cause2(other 1 psa`p'oth 1 gleason1oth 1 tstage2oth 1)
  }
}
if `a'!=1 {
  if `p'==0 {
    stpm2cif cancer_`a'00`p' other_`a'00`p', cause1(cancer 1 age`a'ca 1) cause2(other 1
    age`a'oth 1)
    stpm2cif cancer_`a'01`p' other_`a'01`p', cause1(cancer 1 age`a'ca 1 gleason1ca 1)
    cause2(other 1 age`a'oth 1 gleason1oth 1)
    stpm2cif cancer_`a'10`p' other_`a'10`p', cause1(cancer 1 age`a'ca 1 tstage2ca 1)
    cause2(other 1 age`a'oth 1 tstage2oth 1)
    stpm2cif cancer_`a'11`p' other_`a'11`p', cause1(cancer 1 age`a'ca 1 gleason1ca 1
    tstage2ca 1) cause2(other 1 age`a'oth 1 gleason1oth 1 tstage2oth 1)
  }
  if `p'!=0 {
    stpm2cif cancer_`a'00`p' other_`a'00`p', cause1(cancer 1 age`a'ca 1 psa`p'ca 1)
    cause2(other 1 age`a'oth 1 psa`p'oth 1)
    stpm2cif cancer_`a'01`p' other_`a'01`p', cause1(cancer 1 age`a'ca 1 psa`p'ca 1
    gleason1ca 1) cause2(other 1 age`a'oth 1 psa`p'oth 1 gleason1oth 1)
    stpm2cif cancer_`a'10`p' other_`a'10`p', cause1(cancer 1 age`a'ca 1 psa`p'ca 1
    tstage2ca 1) cause2(other 1 age`a'oth 1 psa`p'oth 1 tstage2oth 1)
    stpm2cif cancer_`a'11`p' other_`a'11`p', cause1(cancer 1 age`a'ca 1 psa`p'ca 1
    gleason1ca 1 tstage2ca 1) cause2(other 1 age`a'oth 1 psa`p'oth 1 gleason1oth 1
    tstage2oth 1)
  }
}
}
}

```

**Web Table 1.** The Absolute Bias in log(HR) Estimates for Death From Prostate Cancer Defined as the Difference in log(HRs) Estimated in 1,500 Nested Case-Control Studies Sampled with Replacement from NPCR and log(HRs) Estimated in NPCR,  $\log(\text{HR}_{\text{ncc}}) - \log(\text{HR}_{\text{NPCR}})$ .

|                  | $\log(\text{HR}_{\text{NPCR}})$ | $\log(\text{HR}_{\text{ncc}})$ |        | $\log(\text{HR}_{\text{ncc}}) - \log(\text{HR}_{\text{NPCR}})$ |         |        |
|------------------|---------------------------------|--------------------------------|--------|----------------------------------------------------------------|---------|--------|
|                  |                                 | Mean                           | SD     | Mean                                                           | 25%     | 75%    |
| Age              |                                 |                                |        |                                                                |         |        |
| ≤55              | -0.0055                         | 0.0206                         | 0.1665 | 0.0262                                                         | -0.0913 | 0.1390 |
| 65.1-75          | 0.9399                          | 0.9581                         | 0.0813 | 0.0182                                                         | -0.0328 | 0.0709 |
| >75              | 1.9490                          | 2.0266                         | 0.1043 | 0.0777                                                         | 0.0059  | 0.1492 |
| PSA              |                                 |                                |        |                                                                |         |        |
| 4-9.9            | 0.2489                          | 0.2399                         | 0.1435 | -0.0090                                                        | -0.1076 | 0.0860 |
| ≥10              | 0.6024                          | 0.6125                         | 0.1481 | 0.0101                                                         | -0.0881 | 0.1124 |
| Gleason score    |                                 |                                |        |                                                                |         |        |
| 7                | 0.7726                          | 0.8211                         | 0.0925 | 0.0484                                                         | -0.0153 | 0.1080 |
| Clinical T stage |                                 |                                |        |                                                                |         |        |
| T1a              | -0.0364                         | 0.0230                         | 0.1709 | 0.0594                                                         | -0.0583 | 0.1751 |
| T1b              | 0.5141                          | 0.6135                         | 0.2091 | 0.0994                                                         | -0.0399 | 0.2448 |
| T2               | 0.5545                          | 0.5995                         | 0.0885 | 0.0449                                                         | -0.0142 | 0.1024 |

Abbreviations:  $\log(\text{HR}_{\text{NPCR}})$ , Logarithm of the hazard ratios estimated in National prostate cancer register of Sweden (NPCR);  $\log(\text{HR}_{\text{ncc}})$ , Logarithm of the hazard ratios estimated from the 1,500 nested case-control studies sampled with replacement from NPCR; SD, Standard deviation; 25% and 75%, Lower and upper 25<sup>th</sup> percentile of the distribution of the absolute bias across 1,500 subsamples; PSA, Prostate Specific Antigen

**Web Table 2.** The Absolute Bias in  $\log(\text{HR})$  Estimates for Other Causes of Death Defined as the Difference in  $\log(\text{HRs})$  Estimated in 1,500 Nested Case-Control Studies Sampled with Replacement from NPCR and  $\log(\text{HRs})$  Estimated in NPCR,  $\log(\text{HR}_{\text{ncc}}) - \log(\text{HR}_{\text{NPCR}})$ .

|                  | $\log(\text{HR}_{\text{NPCR}})$ | $\log(\text{HR}_{\text{ncc}})$ |        | $\log(\text{HR}_{\text{ncc}}) - \log(\text{HR}_{\text{NPCR}})$ |         |        |
|------------------|---------------------------------|--------------------------------|--------|----------------------------------------------------------------|---------|--------|
|                  |                                 | Mean                           | SD     | Mean                                                           | 25%     | 75%    |
| Age              |                                 |                                |        |                                                                |         |        |
| ≤55              | -0.6123                         | -4.4252                        | 7.0309 | -3.8129                                                        | -1.6031 | 0.3715 |
| 65.1-75          | 0.9111                          | 1.0296                         | 0.3470 | 0.1185                                                         | -0.1182 | 0.3572 |
| >75              | 2.0373                          | 2.2255                         | 0.3589 | 0.1882                                                         | -0.0537 | 0.4241 |
| PSA              |                                 |                                |        |                                                                |         |        |
| 4-9.9            | -0.0353                         | 0.0540                         | 0.3454 | 0.0893                                                         | -0.1420 | 0.3187 |
| ≥10              | 0.1883                          | 0.2681                         | 0.3598 | 0.0798                                                         | -0.1692 | 0.3254 |
| Gleason score    |                                 |                                |        |                                                                |         |        |
| 7                | 0.0676                          | 0.0658                         | 0.2626 | -0.0018                                                        | -0.1820 | 0.1730 |
| Clinical T stage |                                 |                                |        |                                                                |         |        |
| T1a              | 0.4883                          | 0.4557                         | 0.3555 | -0.0326                                                        | -0.2642 | 0.2085 |
| T1b              | 0.3496                          | 0.2568                         | 0.4387 | -0.0929                                                        | -0.3724 | 0.2045 |
| T2               | 0.1504                          | 0.1164                         | 0.2358 | -0.0340                                                        | -0.1961 | 0.1277 |

Abbreviations:  $\log(\text{HR}_{\text{NPCR}})$ , Logarithm of the hazard ratios estimated in National prostate cancer register of Sweden (NPCR);  $\log(\text{HR}_{\text{ncc}})$ , Logarithm of the hazard ratios estimated from the 1,500 nested case-control studies sampled with replacement from NPCR; SD, Standard deviation; 25% and 75%, Lower and upper 25<sup>th</sup> percentile of the distribution of the absolute bias across 1,500 subsamples; PSA, Prostate Specific Antigen

**Web Table 3.** The Absolute Bias in CIF Estimates for Death from Prostate Cancer at 5, 10 and 15 years of follow-up. The Absolute Bias was Defined as the Difference in CIFs Estimated in 1,500 Nested Case-Control Studies Sampled with Replacement from NPCR and CIFs Estimated in NPCR,  $CIF_{ncc}-CIF_{NPCR}$ .

|                     | CIF <sub>NPCR</sub> | CIF <sub>ncc</sub> |        | CIF <sub>ncc</sub> -CIF <sub>NPCR</sub> |         |        | Coverage probability |
|---------------------|---------------------|--------------------|--------|-----------------------------------------|---------|--------|----------------------|
|                     |                     | Mean               | SD     | Mean                                    | 25%     | 75%    |                      |
| <b>At 5 years</b>   |                     |                    |        |                                         |         |        |                      |
| Age ≤55             |                     |                    |        |                                         |         |        |                      |
| T1c, GS6, PSA <4    | 0.0027              | 0.0028             | 0.0007 | 0.0001                                  | -0.0004 | 0.0005 | 99.01                |
| T1c, GS6, PSA 4-9.9 | 0.0035              | 0.0035             | 0.0007 | 0.0000                                  | -0.0005 | 0.0005 | 99.00                |
| T1c, GS6, PSA ≥10   | 0.0050              | 0.0051             | 0.0011 | 0.0001                                  | -0.0006 | 0.0008 | 99.16                |
| T1c, GS7, PSA <4    | 0.0059              | 0.0064             | 0.0016 | 0.0006                                  | -0.0006 | 0.0014 | 99.43                |
| T1c, GS7, PSA 4-9.9 | 0.0075              | 0.0080             | 0.0017 | 0.0005                                  | -0.0007 | 0.0015 | 99.50                |
| T1c, GS7, PSA ≥10   | 0.0107              | 0.0116             | 0.0025 | 0.0009                                  | -0.0009 | 0.0024 | 99.79                |
| T2, GS6, PSA <4     | 0.0047              | 0.0052             | 0.0013 | 0.0005                                  | -0.0005 | 0.0012 | 99.43                |
| T2, GS6, PSA 4-9.9  | 0.0061              | 0.0064             | 0.0014 | 0.0004                                  | -0.0006 | 0.0012 | 99.13                |
| T2, GS6, PSA ≥10    | 0.0086              | 0.0093             | 0.0021 | 0.0007                                  | -0.0008 | 0.0020 | 99.48                |
| T2, GS7, PSA <4     | 0.0102              | 0.0117             | 0.0029 | 0.0016                                  | -0.0006 | 0.0032 | 99.57                |
| T2, GS7, PSA 4-9.9  | 0.0131              | 0.0146             | 0.0032 | 0.0015                                  | -0.0008 | 0.0035 | 99.75                |
| T2, GS7, PSA ≥10    | 0.0185              | 0.0210             | 0.0047 | 0.0025                                  | -0.0008 | 0.0053 | 100.00               |
| Average             | 0.0080              | 0.0088             | 0.0020 | 0.0008                                  | -0.0007 | 0.0020 | 99.44                |
| Age 55.1-65         |                     |                    |        |                                         |         |        |                      |
| T1c, GS6, PSA <4    | 0.0027              | 0.0027             | 0.0005 | 0.0000                                  | -0.0004 | 0.0003 | 98.78                |
| T1c, GS6, PSA 4-9.9 | 0.0035              | 0.0034             | 0.0005 | -0.0001                                 | -0.0004 | 0.0002 | 98.19                |
| T1c, GS6, PSA ≥10   | 0.0049              | 0.0049             | 0.0008 | 0.0000                                  | -0.0006 | 0.0004 | 98.13                |
| T1c, GS7, PSA <4    | 0.0059              | 0.0062             | 0.0012 | 0.0003                                  | -0.0006 | 0.0011 | 98.99                |
| T1c, GS7, PSA 4-9.9 | 0.0075              | 0.0077             | 0.0012 | 0.0002                                  | -0.0007 | 0.0010 | 99.19                |
| T1c, GS7, PSA ≥10   | 0.0106              | 0.0111             | 0.0019 | 0.0005                                  | -0.0008 | 0.0017 | 98.89                |
| T2, GS6, PSA <4     | 0.0047              | 0.0050             | 0.0010 | 0.0003                                  | -0.0004 | 0.0009 | 99.49                |
| T2, GS6, PSA 4-9.9  | 0.0060              | 0.0062             | 0.0009 | 0.0002                                  | -0.0005 | 0.0007 | 99.19                |
| T2, GS6, PSA ≥10    | 0.0085              | 0.0089             | 0.0015 | 0.0004                                  | -0.0006 | 0.0013 | 99.40                |
| T2, GS7, PSA <4     | 0.0101              | 0.0113             | 0.0023 | 0.0012                                  | -0.0005 | 0.0025 | 99.59                |
| T2, GS7, PSA 4-9.9  | 0.0130              | 0.0141             | 0.0023 | 0.0011                                  | -0.0006 | 0.0024 | 99.55                |
| T2, GS7, PSA ≥10    | 0.0184              | 0.0202             | 0.0034 | 0.0019                                  | -0.0005 | 0.0039 | 99.40                |
| Average             | 0.0080              | 0.0085             | 0.0014 | 0.0005                                  | -0.0006 | 0.0014 | 99.07                |
| Age 65.1-75         |                     |                    |        |                                         |         |        |                      |
| T1c, GS6, PSA <4    | 0.0068              | 0.0069             | 0.0013 | 0.0001                                  | -0.0008 | 0.0010 | 98.24                |
| T1c, GS6, PSA 4-9.9 | 0.0087              | 0.0086             | 0.0013 | 0.0000                                  | -0.0009 | 0.0008 | 98.15                |
| T1c, GS6, PSA ≥10   | 0.0122              | 0.0124             | 0.0019 | 0.0002                                  | -0.0011 | 0.0014 | 99.08                |
| T1c, GS7, PSA <4    | 0.0145              | 0.0156             | 0.0032 | 0.0011                                  | -0.0012 | 0.0030 | 98.82                |
| T1c, GS7, PSA 4-9.9 | 0.0186              | 0.0196             | 0.0031 | 0.0010                                  | -0.0012 | 0.0028 | 98.91                |
| T1c, GS7, PSA ≥10   | 0.0261              | 0.0281             | 0.0046 | 0.0020                                  | -0.0012 | 0.0047 | 98.91                |
| T2, GS6, PSA <4     | 0.0117              | 0.0125             | 0.0025 | 0.0009                                  | -0.0009 | 0.0024 | 98.99                |

|                     | CIF <sub>NPCR</sub> | CIF <sub>ncc</sub> |        | CIF <sub>ncc</sub> -CIF <sub>NPCR</sub> |         |        | Coverage probability |
|---------------------|---------------------|--------------------|--------|-----------------------------------------|---------|--------|----------------------|
|                     |                     | Mean               | SD     | Mean                                    | 25%     | 75%    |                      |
| T2, GS6, PSA 4-9.9  | 0.0150              | 0.0157             | 0.0024 | 0.0008                                  | -0.0009 | 0.0023 | 99.08                |
| T2, GS6, PSA ≥10    | 0.0210              | 0.0226             | 0.0036 | 0.0017                                  | -0.0010 | 0.0041 | 99.58                |
| T2, GS7, PSA <4     | 0.0250              | 0.0283             | 0.0057 | 0.0034                                  | -0.0007 | 0.0069 | 99.24                |
| T2, GS7, PSA 4-9.9  | 0.0320              | 0.0355             | 0.0057 | 0.0036                                  | -0.0006 | 0.0071 | 99.16                |
| T2, GS7, PSA ≥10    | 0.0446              | 0.0508             | 0.0082 | 0.0061                                  | 0.0001  | 0.0112 | 99.16                |
| Average             | 0.0197              | 0.0214             | 0.0036 | 0.0017                                  | -0.0009 | 0.0040 | 98.94                |
| <b>Age &gt;75</b>   |                     |                    |        |                                         |         |        |                      |
| T1c, GS6, PSA <4    | 0.0169              | 0.0193             | 0.0038 | 0.0024                                  | -0.0004 | 0.0047 | 99.58                |
| T1c, GS6, PSA 4-9.9 | 0.0217              | 0.0242             | 0.0038 | 0.0025                                  | -0.0001 | 0.0049 | 99.50                |
| T1c, GS6, PSA ≥10   | 0.0298              | 0.0345             | 0.0055 | 0.0046                                  | 0.0009  | 0.0079 | 98.99                |
| T1c, GS7, PSA <4    | 0.0359              | 0.0434             | 0.0092 | 0.0075                                  | 0.0009  | 0.0130 | 98.99                |
| T1c, GS7, PSA 4-9.9 | 0.0460              | 0.0543             | 0.0095 | 0.0083                                  | 0.0014  | 0.0141 | 98.74                |
| T1c, GS7, PSA ≥10   | 0.0627              | 0.0766             | 0.0133 | 0.0139                                  | 0.0044  | 0.0214 | 96.81                |
| T2, GS6, PSA <4     | 0.0286              | 0.0348             | 0.0070 | 0.0062                                  | 0.0012  | 0.0104 | 98.99                |
| T2, GS6, PSA 4-9.9  | 0.0367              | 0.0436             | 0.0071 | 0.0069                                  | 0.0017  | 0.0113 | 98.66                |
| T2, GS6, PSA ≥10    | 0.0501              | 0.0617             | 0.0101 | 0.0116                                  | 0.0045  | 0.0181 | 96.64                |
| T2, GS7, PSA <4     | 0.0602              | 0.0774             | 0.0162 | 0.0172                                  | 0.0055  | 0.0271 | 97.82                |
| T2, GS7, PSA 4-9.9  | 0.0769              | 0.0964             | 0.0168 | 0.0195                                  | 0.0079  | 0.0298 | 95.38                |
| T2, GS7, PSA ≥10    | 0.1036              | 0.1345             | 0.0228 | 0.0309                                  | 0.0153  | 0.0447 | 89.76                |
| Average             | 0.0474              | 0.0584             | 0.0104 | 0.0110                                  | 0.0036  | 0.0173 | 97.49                |
| <b>At 10 years</b>  |                     |                    |        |                                         |         |        |                      |
| <b>Age ≤55</b>      |                     |                    |        |                                         |         |        |                      |
| T1c, GS6, PSA <4    | 0.0099              | 0.0098             | 0.0023 | -0.0001                                 | -0.0017 | 0.0013 | 97.93                |
| T1c, GS6, PSA 4-9.9 | 0.0127              | 0.0123             | 0.0025 | -0.0004                                 | -0.0021 | 0.0011 | 97.93                |
| T1c, GS6, PSA ≥10   | 0.0179              | 0.0176             | 0.0037 | -0.0003                                 | -0.0030 | 0.0021 | 98.27                |
| T1c, GS7, PSA <4    | 0.0213              | 0.0223             | 0.0054 | 0.0010                                  | -0.0028 | 0.0039 | 98.86                |
| T1c, GS7, PSA 4-9.9 | 0.0272              | 0.0278             | 0.0059 | 0.0006                                  | -0.0035 | 0.0041 | 98.54                |
| T1c, GS7, PSA ≥10   | 0.0383              | 0.0396             | 0.0087 | 0.0014                                  | -0.0049 | 0.0064 | 99.29                |
| T2, GS6, PSA <4     | 0.0171              | 0.0179             | 0.0044 | 0.0008                                  | -0.0024 | 0.0032 | 99.14                |
| T2, GS6, PSA 4-9.9  | 0.0219              | 0.0224             | 0.0048 | 0.0005                                  | -0.0030 | 0.0034 | 98.81                |
| T2, GS6, PSA ≥10    | 0.0308              | 0.0320             | 0.0071 | 0.0011                                  | -0.0040 | 0.0055 | 98.94                |
| T2, GS7, PSA <4     | 0.0366              | 0.0402             | 0.0099 | 0.0036                                  | -0.0035 | 0.0091 | 99.41                |
| T2, GS7, PSA 4-9.9  | 0.0467              | 0.0501             | 0.0109 | 0.0034                                  | -0.0045 | 0.0099 | 99.25                |
| T2, GS7, PSA ≥10    | 0.0653              | 0.0709             | 0.0156 | 0.0056                                  | -0.0058 | 0.0147 | 99.82                |
| Average             | 0.0288              | 0.0302             | 0.0068 | 0.0014                                  | -0.0034 | 0.0054 | 98.85                |
| <b>Age 55.1-65</b>  |                     |                    |        |                                         |         |        |                      |
| T1c, GS6, PSA <4    | 0.0097              | 0.0094             | 0.0018 | -0.0004                                 | -0.0016 | 0.0008 | 96.97                |
| T1c, GS6, PSA 4-9.9 | 0.0125              | 0.0118             | 0.0017 | -0.0007                                 | -0.0019 | 0.0004 | 96.89                |
| T1c, GS6, PSA ≥10   | 0.0176              | 0.0169             | 0.0027 | -0.0006                                 | -0.0025 | 0.0010 | 97.31                |
| T1c, GS7, PSA <4    | 0.0209              | 0.0213             | 0.0042 | 0.0004                                  | -0.0028 | 0.0031 | 98.15                |
| T1c, GS7, PSA 4-9.9 | 0.0268              | 0.0267             | 0.0042 | -0.0001                                 | -0.0031 | 0.0025 | 98.57                |
| T1c, GS7, PSA ≥10   | 0.0375              | 0.0382             | 0.0064 | 0.0007                                  | -0.0036 | 0.0047 | 98.40                |
| T2, GS6, PSA <4     | 0.0168              | 0.0171             | 0.0033 | 0.0003                                  | -0.0021 | 0.0024 | 98.40                |
| T2, GS6, PSA 4-9.9  | 0.0215              | 0.0214             | 0.0032 | -0.0001                                 | -0.0024 | 0.0020 | 98.74                |
| T2, GS6, PSA ≥10    | 0.0301              | 0.0307             | 0.0049 | 0.0006                                  | -0.0029 | 0.0036 | 98.74                |

|                     | CIF <sub>NPCR</sub> | CIF <sub>ncc</sub> |        | CIF <sub>ncc</sub> -CIF <sub>NPCR</sub> |         |        | Coverage probability |
|---------------------|---------------------|--------------------|--------|-----------------------------------------|---------|--------|----------------------|
|                     |                     | Mean               | SD     | Mean                                    | 25%     | 75%    |                      |
| T2, GS7, PSA <4     | 0.0358              | 0.0385             | 0.0077 | 0.0026                                  | -0.0030 | 0.0074 | 99.41                |
| T2, GS7, PSA 4-9.9  | 0.0458              | 0.0481             | 0.0077 | 0.0023                                  | -0.0032 | 0.0072 | 99.33                |
| T2, GS7, PSA ≥10    | 0.0637              | 0.0684             | 0.0113 | 0.0047                                  | -0.0032 | 0.0115 | 99.33                |
| Average             | 0.0282              | 0.0290             | 0.0049 | 0.0008                                  | -0.0027 | 0.0039 | 98.35                |
| <b>Age 65.1-75</b>  |                     |                    |        |                                         |         |        |                      |
| T1c, GS6, PSA <4    | 0.0231              | 0.0230             | 0.0043 | -0.0002                                 | -0.0034 | 0.0027 | 98.15                |
| T1c, GS6, PSA 4-9.9 | 0.0297              | 0.0288             | 0.0041 | -0.0009                                 | -0.0038 | 0.0017 | 97.65                |
| T1c, GS6, PSA ≥10   | 0.0409              | 0.0407             | 0.0063 | -0.0002                                 | -0.0047 | 0.0036 | 98.24                |
| T1c, GS7, PSA <4    | 0.0490              | 0.0513             | 0.0102 | 0.0023                                  | -0.0053 | 0.0088 | 98.66                |
| T1c, GS7, PSA 4-9.9 | 0.0626              | 0.0642             | 0.0101 | 0.0015                                  | -0.0056 | 0.0078 | 98.66                |
| T1c, GS7, PSA ≥10   | 0.0854              | 0.0896             | 0.0146 | 0.0042                                  | -0.0059 | 0.0132 | 98.74                |
| T2, GS6, PSA <4     | 0.0392              | 0.0412             | 0.0080 | 0.0020                                  | -0.0035 | 0.0067 | 98.91                |
| T2, GS6, PSA 4-9.9  | 0.0502              | 0.0515             | 0.0077 | 0.0013                                  | -0.0041 | 0.0064 | 98.66                |
| T2, GS6, PSA ≥10    | 0.0685              | 0.0721             | 0.0114 | 0.0036                                  | -0.0047 | 0.0109 | 99.41                |
| T2, GS7, PSA <4     | 0.0820              | 0.0908             | 0.0180 | 0.0087                                  | -0.0041 | 0.0197 | 99.16                |
| T2, GS7, PSA 4-9.9  | 0.1043              | 0.1128             | 0.0177 | 0.0085                                  | -0.0043 | 0.0200 | 98.99                |
| T2, GS7, PSA ≥10    | 0.1403              | 0.1553             | 0.0247 | 0.0150                                  | -0.0030 | 0.0306 | 99.08                |
| Average             | 0.0646              | 0.0684             | 0.0114 | 0.0038                                  | -0.0044 | 0.0110 | 98.69                |
| <b>Age &gt;75</b>   |                     |                    |        |                                         |         |        |                      |
| T1c, GS6, PSA <4    | 0.0496              | 0.0557             | 0.0119 | 0.0061                                  | -0.0023 | 0.0133 | 99.50                |
| T1c, GS6, PSA 4-9.9 | 0.0638              | 0.0695             | 0.0122 | 0.0057                                  | -0.0027 | 0.0131 | 98.99                |
| T1c, GS6, PSA ≥10   | 0.0827              | 0.0937             | 0.0173 | 0.0110                                  | -0.0011 | 0.0218 | 98.74                |
| T1c, GS7, PSA <4    | 0.1013              | 0.1204             | 0.0276 | 0.0191                                  | -0.0005 | 0.0362 | 99.33                |
| T1c, GS7, PSA 4-9.9 | 0.1290              | 0.1485             | 0.0286 | 0.0195                                  | -0.0003 | 0.0378 | 98.32                |
| T1c, GS7, PSA ≥10   | 0.1636              | 0.1957             | 0.0387 | 0.0320                                  | 0.0045  | 0.0567 | 96.39                |
| T2, GS6, PSA <4     | 0.0802              | 0.0963             | 0.0215 | 0.0161                                  | 0.0009  | 0.0290 | 98.99                |
| T2, GS6, PSA 4-9.9  | 0.1026              | 0.1192             | 0.0223 | 0.0166                                  | 0.0012  | 0.0307 | 97.98                |
| T2, GS6, PSA ≥10    | 0.1302              | 0.1577             | 0.0304 | 0.0275                                  | 0.0053  | 0.0474 | 96.39                |
| T2, GS7, PSA <4     | 0.1591              | 0.2010             | 0.0455 | 0.0418                                  | 0.0103  | 0.0707 | 95.89                |
| T2, GS7, PSA 4-9.9  | 0.2003              | 0.2445             | 0.0468 | 0.0441                                  | 0.0117  | 0.0738 | 93.79                |
| T2, GS7, PSA ≥10    | 0.2462              | 0.3117             | 0.0589 | 0.0655                                  | 0.0241  | 0.1046 | 88.08                |
| Average             | 0.1257              | 0.1512             | 0.0301 | 0.0254                                  | 0.0043  | 0.0446 | 96.87                |
| <b>At 15 years</b>  |                     |                    |        |                                         |         |        |                      |
| <b>Age ≤55</b>      |                     |                    |        |                                         |         |        |                      |
| T1c, GS6, PSA <4    | 0.0215              | 0.0209             | 0.0050 | -0.0006                                 | -0.0042 | 0.0022 | 96.91                |
| T1c, GS6, PSA 4-9.9 | 0.0275              | 0.0263             | 0.0055 | -0.0013                                 | -0.0053 | 0.0021 | 97.32                |
| T1c, GS6, PSA ≥10   | 0.0385              | 0.0375             | 0.0082 | -0.0011                                 | -0.0069 | 0.0039 | 97.85                |
| T1c, GS7, PSA <4    | 0.0458              | 0.0468             | 0.0114 | 0.0010                                  | -0.0073 | 0.0074 | 98.22                |
| T1c, GS7, PSA 4-9.9 | 0.0584              | 0.0583             | 0.0125 | -0.0001                                 | -0.0087 | 0.0075 | 98.11                |
| T1c, GS7, PSA ≥10   | 0.0812              | 0.0819             | 0.0183 | 0.0007                                  | -0.0123 | 0.0119 | 98.63                |
| T2, GS6, PSA <4     | 0.0368              | 0.0377             | 0.0093 | 0.0008                                  | -0.0059 | 0.0064 | 98.69                |
| T2, GS6, PSA 4-9.9  | 0.0471              | 0.0471             | 0.0102 | 0.0000                                  | -0.0074 | 0.0061 | 98.39                |
| T2, GS6, PSA ≥10    | 0.0655              | 0.0661             | 0.0148 | 0.0006                                  | -0.0098 | 0.0100 | 98.51                |
| T2, GS7, PSA <4     | 0.0777              | 0.0825             | 0.0204 | 0.0048                                  | -0.0095 | 0.0159 | 99.12                |
| T2, GS7, PSA 4-9.9  | 0.0987              | 0.1030             | 0.0226 | 0.0043                                  | -0.0118 | 0.0181 | 98.92                |



|                     | CIF <sub>NPCR</sub> | CIF <sub>ncc</sub> |        | CIF <sub>ncc</sub> -CIF <sub>NPCR</sub> |         |        | Coverage probability |
|---------------------|---------------------|--------------------|--------|-----------------------------------------|---------|--------|----------------------|
|                     |                     | Mean               | SD     | Mean                                    | 25%     | 75%    |                      |
| T2, GS7, PSA ≥10    | 0.1356              | 0.1434             | 0.0319 | 0.0078                                  | -0.0151 | 0.0281 | 99.59                |
| Average             | 0.0612              | 0.0626             | 0.0142 | 0.0014                                  | -0.0087 | 0.0100 | 98.35                |
| Age 55.1-65         |                     |                    |        |                                         |         |        |                      |
| T1c, GS6, PSA <4    | 0.0208              | 0.0198             | 0.0037 | -0.0010                                 | -0.0037 | 0.0014 | 96.72                |
| T1c, GS6, PSA 4-9.9 | 0.0267              | 0.0248             | 0.0036 | -0.0018                                 | -0.0045 | 0.0005 | 96.39                |
| T1c, GS6, PSA ≥10   | 0.0370              | 0.0352             | 0.0056 | -0.0019                                 | -0.0058 | 0.0016 | 96.64                |
| T1c, GS7, PSA <4    | 0.0442              | 0.0443             | 0.0088 | 0.0001                                  | -0.0065 | 0.0056 | 98.15                |
| T1c, GS7, PSA 4-9.9 | 0.0565              | 0.0555             | 0.0089 | -0.0010                                 | -0.0071 | 0.0046 | 98.15                |
| T1c, GS7, PSA ≥10   | 0.0778              | 0.0778             | 0.0132 | 0.0000                                  | -0.0090 | 0.0079 | 98.07                |
| T2, GS6, PSA <4     | 0.0355              | 0.0356             | 0.0069 | 0.0001                                  | -0.0049 | 0.0045 | 98.32                |
| T2, GS6, PSA 4-9.9  | 0.0454              | 0.0445             | 0.0068 | -0.0009                                 | -0.0056 | 0.0035 | 98.57                |
| T2, GS6, PSA ≥10    | 0.0625              | 0.0625             | 0.0103 | 0.0000                                  | -0.0075 | 0.0063 | 98.49                |
| T2, GS7, PSA <4     | 0.0746              | 0.0787             | 0.0157 | 0.0041                                  | -0.0074 | 0.0134 | 99.08                |
| T2, GS7, PSA 4-9.9  | 0.0949              | 0.0980             | 0.0158 | 0.0031                                  | -0.0085 | 0.0127 | 99.41                |
| T2, GS7, PSA ≥10    | 0.1290              | 0.1356             | 0.0226 | 0.0066                                  | -0.0095 | 0.0204 | 98.99                |
| Average             | 0.0587              | 0.0594             | 0.0102 | 0.0006                                  | -0.0067 | 0.0069 | 98.08                |
| Age 65.1-75         |                     |                    |        |                                         |         |        |                      |
| T1c, GS6, PSA <4    | 0.0465              | 0.0447             | 0.0088 | -0.0018                                 | -0.0082 | 0.0036 | 96.89                |
| T1c, GS6, PSA 4-9.9 | 0.0596              | 0.0558             | 0.0085 | -0.0038                                 | -0.0097 | 0.0016 | 96.47                |
| T1c, GS6, PSA ≥10   | 0.0797              | 0.0761             | 0.0129 | -0.0036                                 | -0.0124 | 0.0045 | 96.64                |
| T1c, GS7, PSA <4    | 0.0962              | 0.0974             | 0.0205 | 0.0012                                  | -0.0137 | 0.0141 | 98.07                |
| T1c, GS7, PSA 4-9.9 | 0.1222              | 0.1206             | 0.0203 | -0.0016                                 | -0.0158 | 0.0112 | 97.73                |
| T1c, GS7, PSA ≥10   | 0.1606              | 0.1615             | 0.0291 | 0.0009                                  | -0.0185 | 0.0195 | 98.07                |
| T2, GS6, PSA <4     | 0.0768              | 0.0779             | 0.0161 | 0.0011                                  | -0.0101 | 0.0106 | 98.15                |
| T2, GS6, PSA 4-9.9  | 0.0980              | 0.0968             | 0.0160 | -0.0012                                 | -0.0123 | 0.0090 | 97.73                |
| T2, GS6, PSA ≥10    | 0.1290              | 0.1300             | 0.0232 | 0.0010                                  | -0.0156 | 0.0156 | 98.40                |
| T2, GS7, PSA <4     | 0.1552              | 0.1654             | 0.0348 | 0.0102                                  | -0.0139 | 0.0319 | 98.15                |
| T2, GS7, PSA 4-9.9  | 0.1952              | 0.2026             | 0.0345 | 0.0074                                  | -0.0164 | 0.0303 | 98.24                |
| T2, GS7, PSA ≥10    | 0.2497              | 0.2638             | 0.0466 | 0.0141                                  | -0.0184 | 0.0450 | 97.73                |
| Average             | 0.1224              | 0.1244             | 0.0226 | 0.0020                                  | -0.0138 | 0.0164 | 97.69                |
| Age >75             |                     |                    |        |                                         |         |        |                      |
| T1c, GS6, PSA <4    | 0.0830              | 0.0882             | 0.0243 | 0.0053                                  | -0.0123 | 0.0212 | 97.48                |
| T1c, GS6, PSA 4-9.9 | 0.1065              | 0.1083             | 0.0255 | 0.0019                                  | -0.0159 | 0.0175 | 97.06                |
| T1c, GS6, PSA ≥10   | 0.1294              | 0.1369             | 0.0347 | 0.0075                                  | -0.0180 | 0.0289 | 97.73                |
| T1c, GS7, PSA <4    | 0.1611              | 0.1817             | 0.0523 | 0.0207                                  | -0.0173 | 0.0554 | 97.39                |
| T1c, GS7, PSA 4-9.9 | 0.2029              | 0.2190             | 0.0541 | 0.0161                                  | -0.0206 | 0.0501 | 96.55                |
| T1c, GS7, PSA ≥10   | 0.2381              | 0.2678             | 0.0681 | 0.0297                                  | -0.0180 | 0.0761 | 95.88                |
| T2, GS6, PSA <4     | 0.1268              | 0.1448             | 0.0422 | 0.0180                                  | -0.0121 | 0.0449 | 96.05                |
| T2, GS6, PSA 4-9.9  | 0.1611              | 0.1756             | 0.0442 | 0.0144                                  | -0.0172 | 0.0434 | 96.22                |
| T2, GS6, PSA ≥10    | 0.1896              | 0.2160             | 0.0564 | 0.0264                                  | -0.0146 | 0.0629 | 96.13                |
| T2, GS7, PSA <4     | 0.2345              | 0.2820             | 0.0796 | 0.0475                                  | -0.0090 | 0.1015 | 94.03                |
| T2, GS7, PSA 4-9.9  | 0.2345              | 0.3322             | 0.0801 | 0.0427                                  | -0.0157 | 0.0954 | 93.45                |
| T2, GS7, PSA ≥10    | 0.3258              | 0.3905             | 0.0917 | 0.0647                                  | -0.0024 | 0.1278 | 92.02                |
| Average             | 0.1828              | 0.2119             | 0.0544 | 0.0246                                  | -0.0144 | 0.0604 | 95.83                |

Abbreviations:  $CIF_{NPCR}$ , Cumulative incidence functions estimated in the National Prostate Cancer Register of Sweden (NPCR);  $CIF_{ncc}$ , Cumulative incidence functions estimated from the 1,500 nested case-control studies sampled with replacement from NPCR; SD, Standard deviation; 25% and 75%, lower and upper 25<sup>th</sup> percentile of the distribution of the absolute bias across 1,500 subsamples; T, Clinical tumor stage; GS, Gleason score; PSA, Prostate Specific Antigen

**Web Figure 1.** Logarithm of the cause-specific hazard ratios and 95% confidence intervals of the risk of dying from prostate cancer and other causes estimated in NPCR, Sweden, 1998-2011, and using Method 1 and Method 2. Reference categories (age 55.1-65, PSA <4, Gleason score ≤6, clinical tumor stage T1c) and estimates for the matching variables (year and county of diagnosis) are not shown in the figure.

Abbreviations: PSA, prostate-specific antigen; log(HR), Logarithm of the hazard ratio; NPCR, National Prostate Cancer Register of Sweden

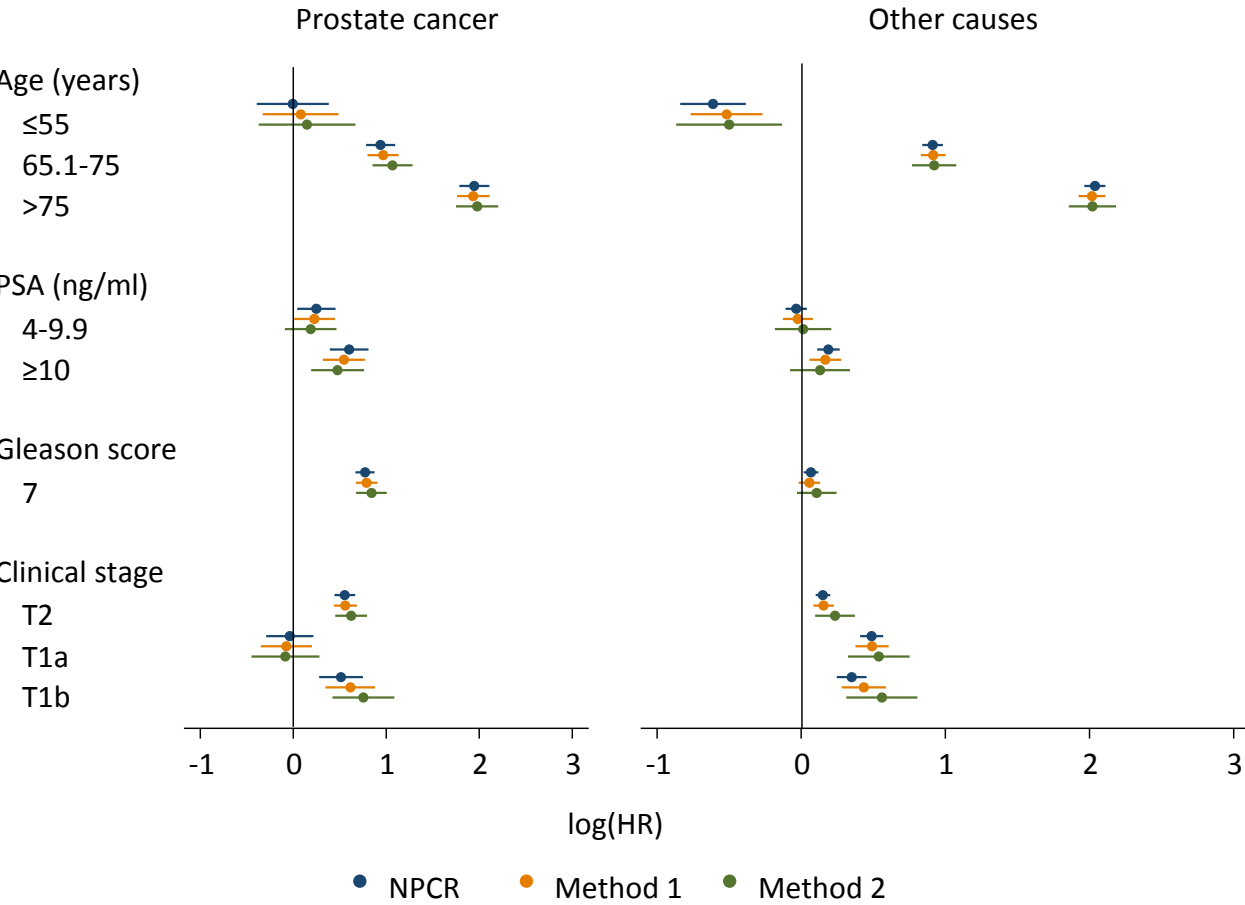

**Web Figure 2.** Cumulative incidence function and 95% confidence intervals of dying from prostate cancer for men with low- and intermediate-risk prostate cancer in NPCR and in ProMort, Sweden, 1998-2011. CIFs were estimated for different combinations of risk factors at 5 (A), 10 (B) and 15 (C) years of follow-up. Year (2004) and county (Västra Götaland) of diagnosis were kept constant.

NPCR, National prostate cancer register of Sweden; T, Clinical tumor stage; GS, Gleason score; PSA, prostate-specific antigen

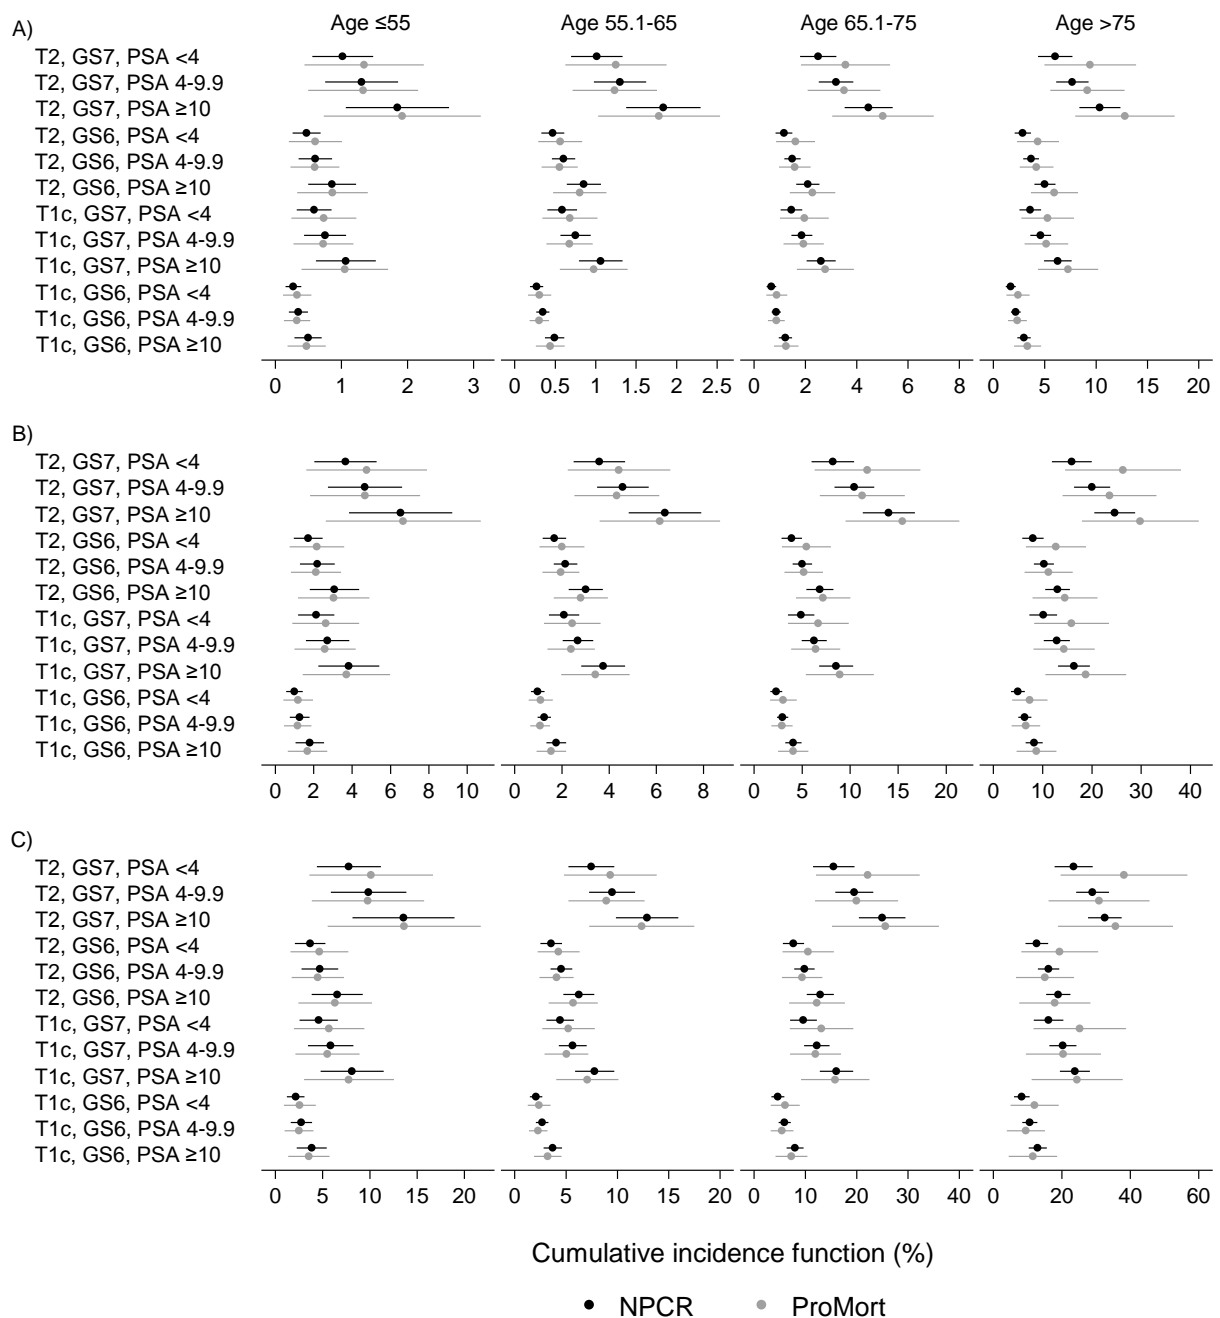

**Web Figure 3.** Cumulative incidence function and 95% confidence intervals of dying from prostate cancer for men with low- and intermediate-risk prostate cancer in NPCR, Sweden, 1998-2011, and using Method 1 and Method 2. CIFs were estimated for different combinations of risk factors at 5 (A), 10 (B) and 15 (C) years of follow-up. Year (2004) and county (Västra Götaland) of diagnosis were kept constant.

Abbreviations: T, Clinical tumor stage; GS, Gleason score; PSA, prostate-specific antigen, NPCR, National Prostate Cancer Register of Sweden

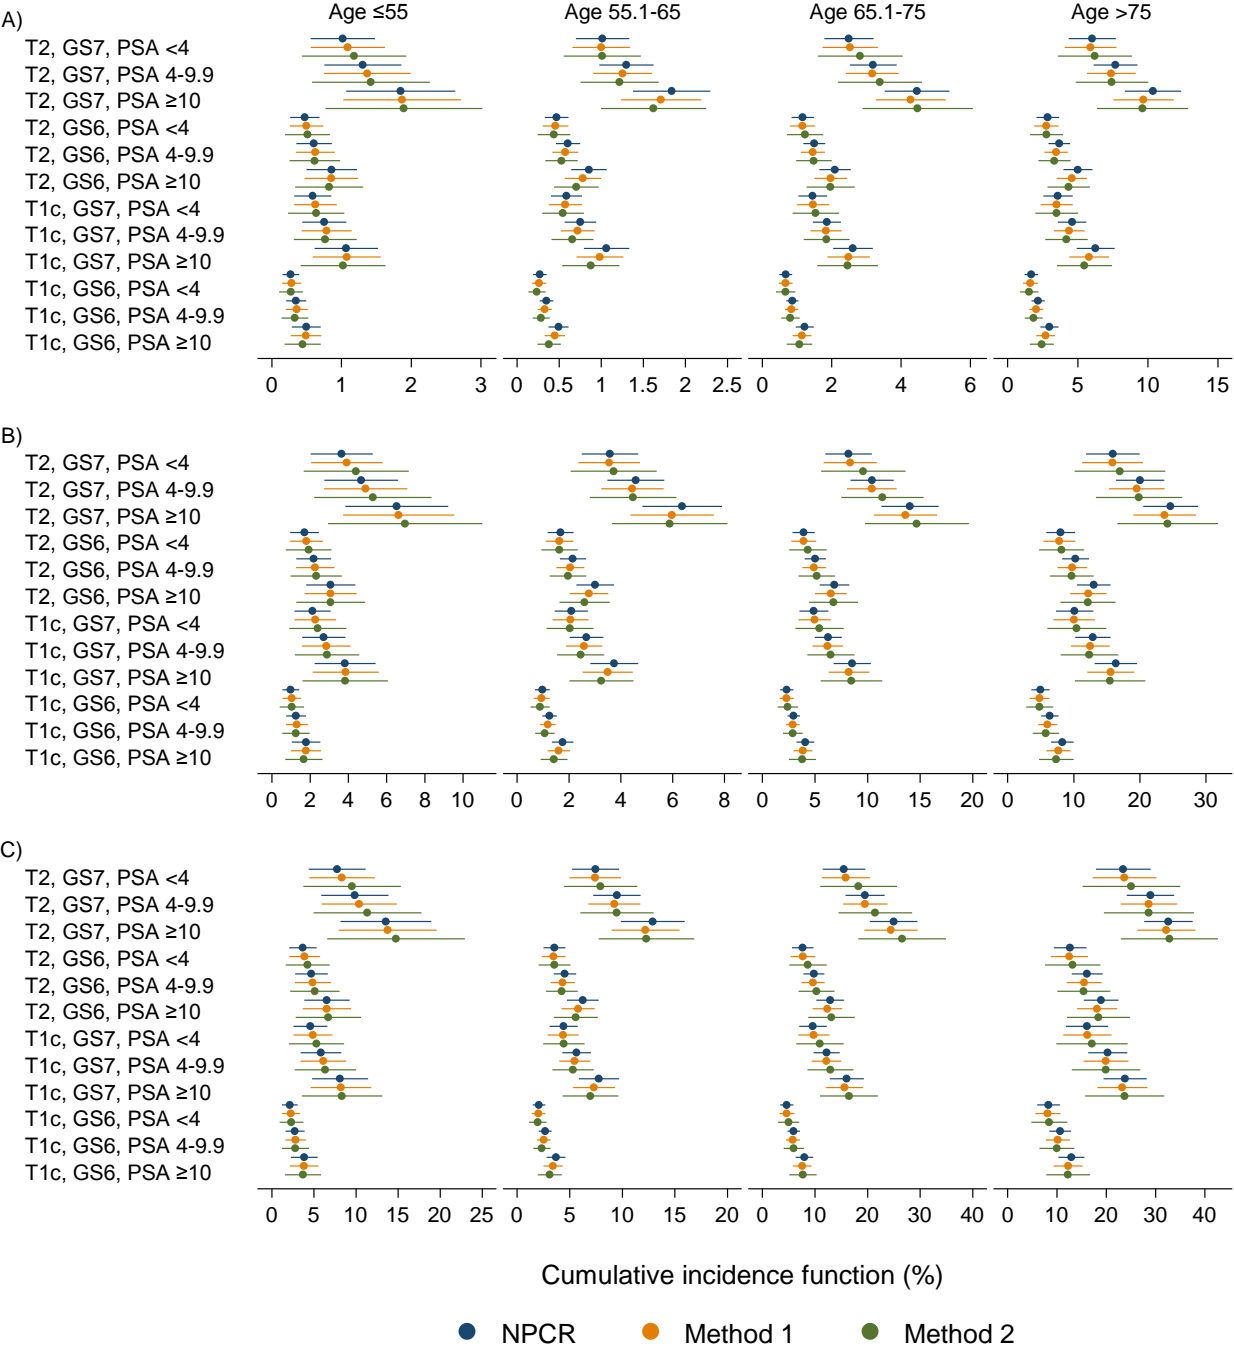

Supplement: kwz026_zelic_web_material_final.pdf [file kwz026_zelic_web_material_final.pdf]
